# Supplementary material for: Artificial intelligence in cataract grading system: a LOCS III-based hybrid model achieving high-precision classification
Source: Front Cell Dev Biol. 2025 Sep 9;13:1669696. doi: 10.3389/fcell.2025.1669696 (PMC12454382; doi:10.3389/fcell.2025.1669696)
Supplement: Supplementary file 1 [file Table1.xlsx]

## Sheet: Sheet1
Table S1: Statistics of cataract classification dataset
	Training subset	Test subsets	Total
The slit-beam image of healthy eye	118	84	202
The slit-beam image of nuclear cataract	312	201	513
The C grade is 0 under the retro-illuminated	52	48	100
Cortical cataract under the retro-illuminated	121	67	188
The P grade is 0 under the retro-illuminated	88	53	141
Posterior subcapsular cataract under the retro-illuminated	85	62	147
Table S2: Statistics of NO、NC、C、P classification dataset
	Training subset	Test subsets	Total
NO0	151	58	209
NO1	27	21	48
NO2	88	82	170
NO3	75	67	142
NO4	28	14	42
NO5	27	28	55
NO6	34	15	49
NC0	121	88	209
NC1	34	16	50
NC2	91	72	163
NC3	111	63	174
NC4	16	8	24
NC5	16	7	23
NC6	41	31	72
C0	53	48	101
C1	9	6	14
C2	40	21	60
C3	41	24	64
C4	29	11	40
C5	5	4	9
P0	98	53	151
P1	11	4	15
P2	1	13	14
P3	4	3	7
P4	28	19	47
P5	31	23	54
Table S3: Performance Metrics with 95% Confidence Intervals for Nuclear (NO), Cortical (C), and Posterior Subcapsular (P) Cataract Grading
Types	Classification	Recall (%)	95%CI	Precision (%)	95%CI	F1-Score (%)	95%CI	Accuracy (%)	95%CI
NO	NO0/Normal	68.97	61.37-75.53	99.91	96.74-100.00	78.43	73.12-82.67	92.44	86.52-97.17
	NO1	95.24	90.51-98.36	62.5	58.34-65.45	75.47	70.23-79.07	95.44	89.21-98.38
	NO2	91.46	85.43-96.31	90.36	86.35-94.22	90.91	85.67-96.21	94.74	88.56-99.30
	NO3	83.58	78.25-89.32	78.87	74.81-81.97	81.16	75.92-85.87	90.88	84.32-95.97
	NO4	92.86	85.39-97.89	61.9	55.29-67.35	74.29	68.93-78.76	93.33	87.05-98.70
	NO5	82.14	76.54-86.97	92	88.03-95.39	86.79	81.52-91.36	97.54	91.02-99.26
	NO6	66.67	61.56-72.54	90.91	86.18-93.87	76.92	71.65-81.32	97.89	91.35-100.00
NC	NC0/Normal	98.86	96.89-99.65	92.55	86.42-97.42	95.6	89.92-99.75	97.19	90.72-99.80
	NC1	100	94.35-100.00	72.73	66.57-78.83	84.21	78.86-88.73	97.89	90.95-98.95
	NC2	98.61	92.32-99.89	95.9	91.87-98.76	97.26	94.73-100.00	98.6	96.05-99.89
	NC3	95.23	92.29-97.46	93.75	88.62-97.88	94.49	88.93-98.76	97.54	90.41-100.00
	NC4	100	95.34-100.00	61.54	55.41-67.41	76.19	70.82-80.57	98.25	91.72-100.00
	NC5	57.14	53.89-65.45	80	75.87-84.13	66.67	61.23-70.98	98.6	91.26-100.00
	NC6	41.94	36.72-47.02	100	94.74-100.00	59.09	53.67-63.42	93.68	87.21-98.86
C	C0/Normal	100	97.82-100.00	100	95.01-100.00	100	94.36-100.00	100	93.52-100.00
	C1	100	96.67-100.00	100	88.28 - 100.00	100	93.82-100.00	100	92.86-100.00
	C2	95.24	90.45-98.72	95.24	90.11-99.37	95.24	89.62-99.37	98.26	94.03-100.00
	C3	100	96.21-100.00	96	91.87-98.83	97.96	92.35-100.00	99.13	92.56-100.00
	C4	91.67	86.37-96.43	100	94.55-100.00	95.65	90.02-99.87	99.13	93.88-100.00
	C5	75	70.54-79.99	75	69.87-80.13	75	69.67-79.42	98.26	95.15-100.00
P	P0/Normal	96.23	91.38-99.64	100	94.82-100.00	98.08	92.47-99.84	100	92.35-100.00
	P1	100	96.61-100.00	100	93.09-100.00	100	95.26-100.00	98.26	94.73-100.00
	P2	100	95.34-100.00	86.67	80.54-92.80	92.86	87.23-96.97	98.26	92.91-99.56
	P3	100	96.01-100.00	60	53.87-66.13	75	69.21-79.03	98.26	91.32-99.97
	P4	100	95.81-100.00	100	89.36-100.00	100	94.73-100.00	100	91.76-100.00
	P5	91.3	86.98-95.32	100	90.71-100.00	95.45	89.82-99.67	98.26	87.85-99.50
